# Supplementary material
Source: PubMed Central journal article supplement (PMC5634774)
Supplement: supp_the2017-0020_onco12201-sup-0001-suppinfot1.pdf [file supp_the2017-0020_onco12201-sup-0001-suppinfot1.pdf]

Supplemental Table for:

Clinical application of targeted deep sequencing in solid-cancer patients: Utility of targeted deep sequencing for biomarker-selected clinical trial

Seung Tae Kim et al.

**Table S1.** Statistics of targeted deep sequencing for 418 patients

| Type | ID             | GC % | Q30  | Coverage | Panel version | Read count | Sequencing depth | On-target rate |
|------|----------------|------|------|----------|---------------|------------|------------------|----------------|
| 11   | 15_00050_DT_CS | 46   | 92.8 | 1,618    | CS_v1         | 15,103,446 | 1,618            | 64.01%         |
| 11   | 15_00051_DT_CS | 46   | 92.4 | 1,573    | CS_v1         | 15,779,422 | 1,573            | 61.98%         |
| 11   | 15_00052_DT_CS | 46   | 92.5 | 1,611    | CS_v1         | 16,675,454 | 1,611            | 63.14%         |
| 11   | 15_00053_DT_CS | 46   | 92.7 | 1,414    | CS_v1         | 14,954,040 | 1,414            | 61.59%         |
| 11   | 15_00056_DP_CS | 51   | 91.2 | 1,047    | CS_v1         | 15,481,914 | 1,047            | 57.10%         |
| 11   | 15_00142_DP_CS | 48   | 91.4 | 1,291    | CS_v1         | 13,647,088 | 1,291            | 60.10%         |
| 11   | 15_00161_DP_CS | 48   | 90.4 | 1,476    | CS_v1         | 14,469,516 | 1,476            | 62.82%         |
| 11   | 15_00163_DP_CS | 49   | 89.9 | 1,144    | CS_v1         | 12,391,838 | 1,144            | 59.19%         |
| 11   | 15_00164_DP_CS | 49   | 90.6 | 1,438    | CS_v1         | 13,416,504 | 1,438            | 63.51%         |
| 11   | 15_00171_DT_CS | 45   | 90.3 | 1,111    | CS_v2         | 44,023,864 | 1,111            | 56.83%         |
| 11   | 15_00192_DP_CS | 49   | 90.5 | 1,248    | CS_v1         | 15,018,642 | 1,248            | 60.78%         |
| 11   | 15_00193_DP_CS | 48   | 90.8 | 1,382    | CS_v1         | 14,863,180 | 1,382            | 63.22%         |
| 11   | 15_00195_DP_CS | 50   | 90   | 1,477    | CS_v1         | 14,736,904 | 1,477            | 63.50%         |
| 11   | 15_00196_DP_CS | 49   | 90.1 | 1,646    | CS_v1         | 15,368,182 | 1,646            | 65.08%         |
| 11   | 15_00197_DP_CS | 48   | 87.6 | 1,511    | CS_v1         | 14,696,610 | 1,511            | 63.90%         |
| 11   | 15_00198_DP_CS | 50   | 90.6 | 789      | CS_v1         | 14,119,364 | 789              | 52.04%         |
| 11   | 15_00199_DP_CS | 47   | 90.5 | 1,349    | CS_v1         | 14,896,952 | 1,349            | 62.24%         |
| 11   | 15_00200_DP_CS | 47   | 90.4 | 1,508    | CS_v1         | 15,345,030 | 1,508            | 62.24%         |
| 11   | 15_00201_DP_CS | 49   | 90.2 | 1,571    | CS_v1         | 15,589,650 | 1,571            | 62.21%         |
| 11   | 15_00249_DT_CS | 46   | 90.4 | 1,128    | CS_v1         | 12,196,870 | 1,128            | 61.42%         |
| 11   | 15_00251_DT_CS | 46   | 90.1 | 1,289    | CS_v1         | 13,453,330 | 1,289            | 63.14%         |
| 11   | 15_00266_DP_CS | 48   | 87.8 | 851      | CS_v2         | 47,298,516 | 851              | 54.59%         |
| 11   | 15_00267_DP_CS | 49   | 88.7 | 583      | CS_v2         | 50,211,830 | 583              | 46.24%         |
| 11   | 15_00268_DP_CS | 49   | 89.1 | 732      | CS_v2         | 48,784,970 | 732              | 51.21%         |
| 11   | 15_00271_DP_CS | 52   | 86.9 | 609      | CS_v2         | 47,244,878 | 609              | 48.40%         |
| 11   | 15_00383_DT_CS | 45   | 92.2 | 894      | CS_v2         | 36,617,952 | 894              | 56.12%         |
| 11   | 15_00386_DP_CS | 48   | 92.2 | 966      | CS_v2         | 39,386,874 | 966              | 56.96%         |
| 11   | 15_00402_DP_CS | 49   | 89.9 | 1,199    | CS_v1         | 12,561,972 | 1,199            | 63.99%         |
| 11   | 15_00403_DP_CS | 49   | 91.8 | 902      | CS_v2         | 37,187,150 | 902              | 57.03%         |
| 11   | 15_00410_DP_CS | 48   | 90.7 | 874      | CS_v2         | 36,210,458 | 874              | 58.12%         |
| 11   | 15_00417_DT_CS | 45   | 92.3 | 944      | CS_v2         | 39,315,712 | 944              | 54.98%         |
| 11   | 15_00418_DT_CS | 45   | 92.2 | 892      | CS_v2         | 36,943,786 | 892              | 55.89%         |
| 11   | 15_00424_DP_CS | 48   | 90.5 | 964      | CS_v2         | 44,528,378 | 964              | 53.89%         |
| 11   | 15_00427_DP_CS | 49   | 88.1 | 849      | CS_v2         | 42,520,116 | 849              | 57.13%         |
| 11   | 15_00428_DP_CS | 47   | 89.8 | 975      | CS_v2         | 38,781,744 | 975              | 57.43%         |
| 11   | 15_00433_DP_CS | 49   | 90.9 | 1,023    | CS_v2         | 42,008,560 | 1,023            | 55.60%         |
| 11   | 15_00434_DP_CS | 51   | 88.9 | 911      | CS_v2         | 39,951,156 | 911              | 56.64%         |
| 11   | 15_00435_DP_CS | 51   | 89.7 | 923      | CS_v2         | 38,783,360 | 923              | 55.67%         |
| 11   | 15_00439_DP_CS | 52   | 90.4 | 652      | CS_v2         | 44,926,004 | 652              | 51.90%         |
| 11   | CS11_14_01300  | 46   | 90.2 | 772      | CS_v1         | 9,353,756  | 772              | 56.32%         |
| 11   | CS11_14_01307  | 47   | 89.7 | 876      | CS_v1         | 9,738,702  | 876              | 57.86%         |
| 11   | CS11_14_01311  | 46   | 89.3 | 1,002    | CS_v1         | 9,952,412  | 1,002            | 62.78%         |
| 11   | CS11_14_01313  | 46   | 88.6 | 577      | CS_v1         | 5,528,874  | 577              | 63.45%         |
| 11   | CS11_14_01316  | 46   | 88.7 | 966      | CS_v1         | 9,820,634  | 966              | 60.63%         |
| 11   | CS11_14_01318  | 47   | 90   | 624      | CS_v1         | 7,963,106  | 624              | 66.33%         |
| 11   | CS11_14_01319  | 46   | 88.7 | 992      | CS_v1         | 9,171,596  | 992              | 65.28%         |
| 11   | CS11_14_01321  | 45   | 89.8 | 993      | CS_v1         | 9,525,364  | 993              | 64.43%         |

Supplemental Table for:

Clinical application of targeted deep sequencing in solid-cancer patients: Utility of targeted deep sequencing for biomarker-selected clinical trial

Seung Tae Kim et al.

|    |                  |    |      |       |       |            |       |        |
|----|------------------|----|------|-------|-------|------------|-------|--------|
| 11 | CS11_14_01329    | 47 | 88.8 | 643   | CS_v1 | 11,559,130 | 643   | 52.00% |
| 11 | CS11_14_01343    | 46 | 89.2 | 960   | CS_v1 | 11,672,844 | 960   | 51.52% |
| 11 | CS11_14_01359    | 47 | 89.9 | 645   | CS_v1 | 11,394,394 | 645   | 50.02% |
| 11 | CS11_14_01361    | 47 | 89.7 | 784   | CS_v1 | 11,430,708 | 784   | 50.16% |
| 11 | CS11_14_01365    | 47 | 90.3 | 494   | CS_v1 | 9,426,320  | 494   | 52.56% |
| 11 | CS11_14_02245    | 45 | 94   | 634   | CS_v1 | 5,444,890  | 634   | 64.10% |
| 11 | CS11_14_02251    | 45 | 93.7 | 670   | CS_v1 | 5,368,764  | 670   | 68.45% |
| 11 | CS11_14_02308    | 50 | 89.3 | 897   | CS_v1 | 10,264,694 | 897   | 61.36% |
| 11 | CS11_14_02309    | 48 | 89.3 | 1,045 | CS_v1 | 10,411,042 | 1,045 | 58.07% |
| 11 | CS11_14_02310    | 50 | 90.1 | 1,242 | CS_v1 | 11,068,824 | 1,242 | 63.96% |
| 11 | CS11_14_02322    | 46 | 93.1 | 1,066 | CS_v1 | 9,848,722  | 1,066 | 68.21% |
| 11 | CS11_14_02324    | 46 | 93.7 | 1,302 | CS_v1 | 12,148,144 | 1,302 | 63.86% |
| 11 | CS11_14_02325    | 46 | 93.5 | 1,005 | CS_v1 | 11,902,898 | 1,005 | 58.78% |
| 11 | CS11_14_02329    | 47 | 92.8 | 1,265 | CS_v1 | 11,937,274 | 1,265 | 63.75% |
| 11 | CS11_14_02332    | 49 | 92.1 | 395   | CS_v1 | 13,180,912 | 395   | 62.50% |
| 11 | CS11_14_02334    | 50 | 92.2 | 510   | CS_v1 | 13,266,084 | 510   | 67.18% |
| 11 | CS11_14_02345    | 46 | 89.9 | 956   | CS_v1 | 10,166,528 | 956   | 61.89% |
| 11 | CS11_14_02490    | 49 | 89.2 | 1,082 | CS_v1 | 12,847,596 | 1,082 | 60.40% |
| 11 | CS11_14_02559    | 50 | 89.5 | 1,237 | CS_v1 | 10,588,162 | 1,237 | 71.14% |
| 11 | CS11_14_02560    | 47 | 87.9 | 1,314 | CS_v1 | 10,737,462 | 1,314 | 72.99% |
| 11 | CS11_14_02565    | 46 | 90.2 | 1,298 | CS_v1 | 12,598,218 | 1,298 | 65.24% |
| 11 | CS11_14_02600    | 49 | 90.2 | 1,186 | CS_v1 | 10,692,932 | 1,186 | 70.98% |
| 11 | CS11_14_02602    | 50 | 90.4 | 1,109 | CS_v1 | 10,764,230 | 1,109 | 67.35% |
| 11 | CS11_14_02640    | 49 | 89.7 | 1,132 | CS_v1 | 11,290,810 | 1,132 | 67.89% |
| 11 | CS11_14_02677    | 47 | 88.8 | 1,124 | CS_v1 | 11,315,348 | 1,124 | 63.42% |
| 11 | CS11_14_02678    | 46 | 91   | 1,027 | CS_v1 | 10,861,148 | 1,027 | 64.77% |
| 11 | CS11_14_02679    | 45 | 90   | 948   | CS_v1 | 11,663,542 | 948   | 65.09% |
| 11 | CS11_14_02686    | 49 | 91.1 | 1,233 | CS_v2 | 49,766,254 | 1,233 | 15.69% |
| 11 | CS11_14_02705    | 50 | 90   | 203   | CS_v2 | 45,987,500 | 203   | 10.13% |
| 11 | CS11_14_02708    | 47 | 90.4 | 1,072 | CS_v2 | 47,475,412 | 1,072 | 15.23% |
| 11 | CS11_14_02710    | 50 | 90   | 1,059 | CS_v2 | 44,493,778 | 1,059 | 15.84% |
| 11 | CS11_14_02717    | 45 | 90.9 | 1,092 | CS_v2 | 43,323,002 | 1,092 | 15.98% |
| 11 | CS11_14_02718    | 45 | 91.6 | 1,228 | CS_v2 | 47,522,456 | 1,228 | 15.69% |
| 11 | CS11_14_02928    | 50 | 90.2 | 101   | CS_v2 | 35,523,098 | 101   | 10.24% |
| 11 | CS11_14_02929    | 49 | 91.1 | 1,093 | CS_v2 | 44,081,180 | 1,093 | 16.03% |
| 11 | CS11_14_02996    | 47 | 90.9 | 1,221 | CS_v2 | 48,033,588 | 1,221 | 15.24% |
| 11 | CS11_14_03001    | 44 | 91   | 1,109 | CS_v2 | 44,592,594 | 1,109 | 14.71% |
| 11 | CS11_14_03244    | 49 | 88.7 | 1,159 | CS_v2 | 47,319,146 | 1,159 | 15.17% |
| 11 | CS11_14_03359    | 45 | 91.4 | 1,023 | CS_v2 | 46,462,530 | 1,023 | 15.44% |
| 11 | D_15_00765_DP_CS | 50 | 90.8 | 1,006 | CS_v2 | 44,646,148 | 1,006 | 55.68% |
| 11 | D_15_00766_DP_CS | 49 | 91.2 | 930   | CS_v2 | 39,717,318 | 930   | 57.53% |
| 11 | D_15_00767_DP_CS | 49 | 90.5 | 990   | CS_v2 | 42,770,776 | 990   | 56.54% |
| 11 | D_15_00799_DP_CS | 51 | 89.1 | 457   | CS_v2 | 39,616,560 | 457   | 46.80% |
| 11 | D_15_00800_DP_CS | 47 | 91.9 | 1,028 | CS_v2 | 49,379,850 | 1,028 | 54.22% |
| 11 | D_15_00813_DP_CS | 47 | 90.6 | 963   | CS_v2 | 40,335,838 | 963   | 53.50% |
| 11 | D_15_00814_DP_CS | 48 | 90.4 | 971   | CS_v2 | 41,007,380 | 971   | 53.63% |
| 11 | D_15_00852_DP_CS | 45 | 91   | 705   | CS_v2 | 38,963,528 | 705   | 51.57% |
| 11 | D_15_00866_DP_CS | 49 | 89   | 978   | CS_v2 | 40,828,776 | 978   | 59.55% |
| 11 | D_15_00867_DP_CS | 50 | 88.5 | 772   | CS_v2 | 39,898,772 | 772   | 54.92% |
| 11 | D_15_00868_DP_CS | 49 | 89.8 | 822   | CS_v2 | 38,919,990 | 822   | 57.89% |
| 11 | D_15_01008_DP_CS | 48 | 90.2 | 619   | CS_v2 | 38,460,280 | 619   | 54.59% |

Supplemental Table for:

Clinical application of targeted deep sequencing in solid-cancer patients: Utility of targeted deep sequencing for biomarker-selected clinical trial

Seung Tae Kim et al.

|    |                  |    |      |       |       |            |       |        |
|----|------------------|----|------|-------|-------|------------|-------|--------|
| 11 | D_15_01013_DP_CS | 50 | 92   | 251   | CS_v2 | 33,214,060 | 251   | 42.58% |
| 11 | D_15_01019_DT_CS | 46 | 91.4 | 794   | CS_v2 | 41,914,908 | 794   | 56.19% |
| 11 | D_15_01020_DT_CS | 46 | 92.3 | 774   | CS_v2 | 42,626,176 | 774   | 54.11% |
| 11 | D_15_01022_DT_CS | 45 | 91.2 | 929   | CS_v2 | 38,456,364 | 929   | 58.12% |
| 11 | D_15_01086_DP_CS | 51 | 88.9 | 921   | CS_v2 | 39,522,836 | 921   | 56.07% |
| 11 | D_15_01087_DP_CS | 46 | 92   | 794   | CS_v2 | 39,987,272 | 794   | 56.38% |
| 11 | D_15_01088_DP_CS | 48 | 90.3 | 849   | CS_v2 | 37,925,896 | 849   | 57.75% |
| 11 | D_15_01092_DT_CS | 45 | 90.3 | 840   | CS_v2 | 38,736,514 | 840   | 56.55% |
| 11 | D_15_01159_DP_CS | 50 | 90.5 | 818   | CS_v2 | 41,388,068 | 818   | 55.18% |
| 11 | D_15_01166_DP_CS | 50 | 90.6 | 874   | CS_v2 | 38,529,212 | 874   | 58.34% |
| 11 | D_15_01216_DT_CS | 45 | 90.3 | 961   | CS_v2 | 40,840,278 | 961   | 56.11% |
| 11 | D_15_01217_DT_CS | 46 | 90.3 | 970   | CS_v2 | 42,184,490 | 970   | 55.79% |
| 11 | D_15_01218_DT_CS | 45 | 89.8 | 978   | CS_v2 | 41,436,460 | 978   | 55.94% |
| 11 | D_15_01232_DT_CS | 45 | 90.6 | 970   | CS_v2 | 41,976,294 | 970   | 54.73% |
| 11 | D_15_01273_DP_CS | 48 | 89.3 | 784   | CS_v2 | 38,624,052 | 784   | 52.32% |
| 11 | D_15_01431_DP_CS | 47 | 88.8 | 1,156 | CS_v2 | 56,382,814 | 1,156 | 54.63% |
| 11 | D_15_01432_DP_CS | 49 | 88.2 | 645   | CS_v2 | 41,465,768 | 645   | 50.76% |
| 11 | D_15_01437_DT_CS | 45 | 91.4 | 749   | CS_v2 | 32,663,920 | 749   | 53.62% |
| 11 | D_15_01440_DT_CS | 45 | 92.3 | 879   | CS_v2 | 38,262,100 | 879   | 53.85% |
| 11 | D_15_01448_DP_CS | 50 | 88.5 | 990   | CS_v2 | 41,078,778 | 990   | 59.70% |
| 11 | D_15_01451_DP_CS | 48 | 90.5 | 866   | CS_v2 | 39,845,010 | 866   | 55.31% |
| 11 | D_15_01460_DT_CS | 45 | 89.4 | 865   | CS_v2 | 47,199,806 | 865   | 52.87% |
| 11 | D_15_01464_DP_CS | 53 | 90   | 488   | CS_v2 | 35,092,748 | 488   | 51.01% |
| 11 | D_15_01753_DP_CS | 47 | 92.4 | 802   | CS_v2 | 38,832,582 | 802   | 54.32% |
| 11 | D_15_01755_DP_CS | 51 | 87.8 | 836   | CS_v2 | 34,714,256 | 836   | 56.13% |
| 11 | D_15_01758_DP_CS | 50 | 87.7 | 1,087 | CS_v2 | 43,409,600 | 1,087 | 58.56% |
| 11 | D_15_01789_DP_CS | 49 | 90.2 | 1,007 | CS_v2 | 40,865,646 | 1,007 | 58.10% |
| 11 | D_15_01790_DP_CS | 48 | 90.2 | 938   | CS_v2 | 38,165,890 | 938   | 56.50% |
| 11 | D_15_01796_DP_CS | 51 | 89.2 | 795   | CS_v2 | 38,433,672 | 795   | 55.49% |
| 12 | 15_00058_DP_CS   | 50 | 91.8 | 1,565 | CS_v1 | 15,630,264 | 1,565 | 63.71% |
| 12 | 15_00059_DP_CS   | 48 | 91.5 | 1,502 | CS_v1 | 15,815,674 | 1,502 | 61.95% |
| 12 | 15_00064_DP_CS   | 49 | 91.2 | 1,490 | CS_v1 | 15,415,552 | 1,490 | 62.59% |
| 12 | 15_00066_DP_CS   | 50 | 90.9 | 1,402 | CS_v1 | 14,611,736 | 1,402 | 63.23% |
| 12 | 15_00067_DP_CS   | 51 | 90.8 | 1,746 | CS_v1 | 16,881,594 | 1,746 | 63.72% |
| 12 | 15_00165_DP_CS   | 50 | 90.5 | 1,219 | CS_v1 | 13,312,356 | 1,219 | 60.04% |
| 12 | 15_00166_DP_CS   | 50 | 90.8 | 1,447 | CS_v1 | 14,908,186 | 1,447 | 61.33% |
| 12 | 15_00202_DT_CS   | 46 | 90.6 | 1,528 | CS_v1 | 14,600,702 | 1,528 | 63.52% |
| 12 | 15_00222_DP_CS   | 50 | 89.3 | 1,007 | CS_v1 | 12,050,202 | 1,007 | 63.32% |
| 12 | 15_00224_DP_CS   | 49 | 90.5 | 900   | CS_v1 | 14,046,244 | 900   | 57.52% |
| 12 | 15_00225_DP_CS   | 49 | 89   | 1,486 | CS_v1 | 14,930,638 | 1,486 | 64.27% |
| 12 | 15_00228_DP_CS   | 50 | 88.7 | 1,253 | CS_v1 | 13,088,304 | 1,253 | 67.58% |
| 12 | 15_00250_DT_CS   | 46 | 89.8 | 1,170 | CS_v1 | 12,767,800 | 1,170 | 60.97% |
| 12 | 15_00252_DT_CS   | 46 | 90.6 | 1,185 | CS_v1 | 12,463,378 | 1,185 | 63.05% |
| 12 | 15_00262_DT_CS   | 45 | 90   | 1,139 | CS_v2 | 53,604,586 | 1,380 | 58.14% |
| 12 | 15_00265_DT_CS   | 45 | 89.8 | 1,380 | CS_v2 | 46,092,042 | 1,139 | 56.84% |
| 12 | 15_00280_DP_CS   | 47 | 92.3 | 932   | CS_v2 | 38,634,456 | 932   | 58.68% |
| 12 | 15_00281_DP_CS   | 49 | 92.1 | 698   | CS_v2 | 37,113,168 | 698   | 55.01% |
| 12 | 15_00405_DP_CS   | 50 | 92   | 475   | CS_v2 | 39,684,890 | 475   | 48.70% |
| 12 | 15_00408_DP_CS   | 49 | 90.5 | 938   | CS_v2 | 39,005,958 | 938   | 57.70% |
| 12 | 15_00409_DP_CS   | 51 | 90.3 | 688   | CS_v2 | 38,658,906 | 688   | 52.63% |
| 12 | 15_00411_DP_CS   | 48 | 90.7 | 891   | CS_v2 | 38,047,568 | 891   | 56.92% |

Supplemental Table for:

Clinical application of targeted deep sequencing in solid-cancer patients: Utility of targeted deep sequencing for biomarker-selected clinical trial

Seung Tae Kim et al.

|    |                  |    |      |       |       |            |       |        |
|----|------------------|----|------|-------|-------|------------|-------|--------|
| 12 | 15_00415_DT_CS   | 46 | 91.3 | 935   | CS_v2 | 39,988,428 | 935   | 55.70% |
| 12 | 15_00420_DT_CS   | 45 | 91.3 | 831   | CS_v2 | 37,448,568 | 831   | 54.53% |
| 12 | 15_00431_DP_CS   | 49 | 91.3 | 876   | CS_v2 | 43,794,182 | 876   | 56.84% |
| 12 | 15_00432_DP_CS   | 48 | 90.9 | 1,081 | CS_v2 | 43,367,344 | 1,081 | 56.69% |
| 12 | 15_00437_DT_CS   | 45 | 91.4 | 1,013 | CS_v2 | 40,185,004 | 1,013 | 58.10% |
| 12 | 15_00440_DP_CS   | 49 | 90.8 | 1,031 | CS_v2 | 40,349,462 | 1,031 | 57.60% |
| 12 | CS11_14_01303    | 46 | 89.6 | 752   | CS_v1 | 9,711,072  | 752   | 55.18% |
| 12 | CS11_14_01312    | 46 | 88.5 | 1,125 | CS_v1 | 11,616,886 | 1,125 | 61.74% |
| 12 | CS11_14_01323    | 45 | 90.1 | 978   | CS_v1 | 9,183,150  | 978   | 62.79% |
| 12 | CS11_14_01334    | 48 | 89.4 | 673   | CS_v1 | 10,558,318 | 673   | 52.12% |
| 12 | CS11_14_01346    | 47 | 89.8 | 979   | CS_v1 | 11,353,158 | 979   | 52.13% |
| 12 | CS11_14_01348    | 46 | 88.1 | 815   | CS_v1 | 10,154,464 | 815   | 51.06% |
| 12 | CS11_14_01355    | 47 | 88.1 | 890   | CS_v1 | 11,134,392 | 890   | 50.97% |
| 12 | CS11_14_01474    | 44 | 87.5 | 834   | CS_v1 | 8,036,924  | 834   | 63.49% |
| 12 | CS11_14_01476    | 45 | 88.3 | 847   | CS_v1 | 8,474,728  | 847   | 60.87% |
| 12 | CS11_14_01480    | 44 | 93.5 | 1,034 | CS_v1 | 10,385,870 | 1,034 | 62.48% |
| 12 | CS11_14_01481    | 44 | 93.9 | 861   | CS_v1 | 8,081,222  | 861   | 63.92% |
| 12 | CS11_14_01485    | 44 | 94.5 | 943   | CS_v1 | 8,538,928  | 943   | 64.57% |
| 12 | CS11_14_01486    | 45 | 93.9 | 828   | CS_v1 | 7,479,752  | 828   | 64.31% |
| 12 | CS11_14_01492    | 45 | 89.7 | 1,156 | CS_v1 | 11,679,886 | 1,156 | 64.02% |
| 12 | CS11_14_02246    | 45 | 93.8 | 652   | CS_v1 | 5,547,068  | 652   | 65.73% |
| 12 | CS11_14_02250    | 45 | 93.6 | 666   | CS_v1 | 5,449,206  | 666   | 67.77% |
| 12 | CS11_14_02252    | 45 | 94.2 | 671   | CS_v1 | 5,532,922  | 671   | 66.51% |
| 12 | CS11_14_02253    | 46 | 93.1 | 598   | CS_v1 | 4,927,134  | 598   | 66.80% |
| 12 | CS11_14_02314    | 51 | 89.7 | 838   | CS_v1 | 9,725,956  | 838   | 58.32% |
| 12 | CS11_14_02320    | 46 | 92.9 | 1,009 | CS_v1 | 9,846,662  | 1,009 | 61.74% |
| 12 | CS11_14_02326    | 45 | 92.7 | 1,173 | CS_v1 | 12,112,496 | 1,173 | 58.41% |
| 12 | CS11_14_02328    | 45 | 93.7 | 1,164 | CS_v1 | 10,562,852 | 1,164 | 63.37% |
| 12 | CS11_14_02330_re | 44 | 93.2 | 502   | CS_v1 | 25,091,072 | 502   | 11.92% |
| 12 | CS11_14_02331    | 47 | 93.7 | 1,070 | CS_v1 | 11,452,340 | 1,070 | 55.26% |
| 12 | CS11_14_02343    | 46 | 90.2 | 1,035 | CS_v1 | 11,210,268 | 1,035 | 62.16% |
| 12 | CS11_14_02488    | 50 | 89.1 | 1,276 | CS_v1 | 13,508,302 | 1,276 | 63.37% |
| 12 | CS11_14_02491    | 49 | 89.6 | 940   | CS_v1 | 11,803,328 | 940   | 61.03% |
| 12 | CS11_14_02492    | 52 | 87.9 | 1,107 | CS_v1 | 11,834,646 | 1,107 | 60.83% |
| 12 | CS11_14_02493    | 52 | 88.7 | 972   | CS_v1 | 12,429,886 | 972   | 59.85% |
| 12 | CS11_14_02495    | 49 | 89.8 | 1,052 | CS_v1 | 13,927,302 | 1,052 | 58.42% |
| 12 | CS11_14_02497    | 51 | 89.3 | 995   | CS_v1 | 11,848,704 | 995   | 59.09% |
| 12 | CS11_14_02498    | 50 | 91.3 | 466   | CS_v1 | 11,540,716 | 466   | 66.53% |
| 12 | CS11_14_02563    | 51 | 88.9 | 1,310 | CS_v1 | 12,181,130 | 1,310 | 68.65% |
| 12 | CS11_14_02595    | 46 | 90.1 | 1,339 | CS_v1 | 11,482,546 | 1,339 | 69.64% |
| 12 | CS11_14_02598    | 50 | 89.6 | 1,136 | CS_v1 | 9,747,892  | 1,136 | 70.78% |
| 12 | CS11_14_02674    | 47 | 91.1 | 1,216 | CS_v2 | 49,517,166 | 1,216 | 15.86% |
| 12 | CS11_14_02683    | 46 | 88.9 | 1,317 | CS_v1 | 12,311,252 | 1,317 | 69.80% |
| 12 | CS11_14_02701    | 46 | 91.1 | 1,299 | CS_v2 | 50,141,878 | 1,299 | 16.21% |
| 12 | CS11_14_02702    | 47 | 89.9 | 948   | CS_v1 | 10,012,262 | 948   | 63.86% |
| 12 | CS11_14_02709    | 48 | 90.6 | 942   | CS_v2 | 45,513,428 | 942   | 15.03% |
| 12 | CS11_14_02940    | 46 | 91.2 | 1,086 | CS_v2 | 45,433,790 | 1,086 | 15.93% |
| 12 | CS11_14_02943    | 46 | 90.4 | 989   | CS_v2 | 42,407,188 | 989   | 15.22% |
| 12 | CS11_14_02944    | 46 | 91.7 | 1,137 | CS_v2 | 44,004,438 | 1,137 | 16.30% |
| 12 | CS11_14_02948    | 45 | 92   | 1,232 | CS_v2 | 46,298,034 | 1,232 | 16.55% |
| 12 | CS11_14_02950    | 46 | 92.3 | 1,138 | CS_v2 | 46,994,608 | 1,138 | 15.69% |

Supplemental Table for:

Clinical application of targeted deep sequencing in solid-cancer patients: Utility of targeted deep sequencing for biomarker-selected clinical trial

Seung Tae Kim et al.

|    |                  |    |      |       |       |            |       |        |
|----|------------------|----|------|-------|-------|------------|-------|--------|
| 12 | CS11_14_02995    | 49 | 91.2 | 384   | CS_v2 | 43,983,236 | 384   | 12.37% |
| 12 | CS11_14_03005    | 49 | 90.6 | 1,546 | CS_v2 | 58,762,508 | 1,546 | 17.37% |
| 12 | CS11_14_03085    | 45 | 90.5 | 993   | CS_v2 | 41,110,736 | 993   | 15.05% |
| 12 | CS11_14_03158    | 45 | 91.8 | 1,176 | CS_v2 | 49,691,846 | 1,176 | 15.81% |
| 12 | CS11_14_03232    | 47 | 90.8 | 1,304 | CS_v2 | 50,575,494 | 1,304 | 15.10% |
| 12 | CS11_14_03233    | 48 | 90.7 | 1,193 | CS_v2 | 46,607,578 | 1,193 | 15.85% |
| 12 | CS11_14_03235    | 45 | 89.7 | 1,315 | CS_v2 | 56,321,240 | 1,315 | 15.43% |
| 12 | CS11_14_03241    | 49 | 89.2 | 1,112 | CS_v2 | 47,367,572 | 1,112 | 15.38% |
| 12 | CS11_14_03242    | 49 | 88.7 | 1,136 | CS_v2 | 46,922,602 | 1,136 | 15.38% |
| 12 | CS11_14_03276    | 45 | 89.4 | 1,086 | CS_v2 | 45,911,028 | 1,086 | 15.18% |
| 12 | CS11_14_03278    | 50 | 91   | 729   | CS_v2 | 41,269,408 | 729   | 14.16% |
| 12 | CS11_14_03367    | 50 | 88.5 | 894   | CS_v2 | 51,533,294 | 894   | 14.58% |
| 12 | CS11_14_03369    | 47 | 89.8 | 1,233 | CS_v2 | 45,584,196 | 1,233 | 15.90% |
| 12 | CS11_14_03477    | 45 | 88.9 | 1,256 | CS_v2 | 47,965,526 | 1,256 | 16.33% |
| 12 | D_15_00797_DT_CS | 45 | 91.9 | 978   | CS_v2 | 40,665,164 | 978   | 54.42% |
| 12 | D_15_00798_DT_CS | 45 | 91.4 | 945   | CS_v2 | 38,945,782 | 945   | 55.18% |
| 12 | D_15_00805_DP_CS | 47 | 90.2 | 936   | CS_v2 | 40,346,900 | 936   | 55.32% |
| 12 | D_15_00812_DP_CS | 50 | 89.3 | 880   | CS_v2 | 38,118,366 | 880   | 55.65% |
| 12 | D_15_00817_DP_CS | 52 | 89.3 | 683   | CS_v2 | 40,083,162 | 683   | 49.15% |
| 12 | D_15_00967_DT_CS | 45 | 92.2 | 841   | CS_v2 | 36,201,790 | 841   | 54.67% |
| 12 | D_15_00972_DT_CS | 45 | 92.9 | 806   | CS_v2 | 34,829,270 | 806   | 53.84% |
| 12 | D_15_00976_DT_CS | 45 | 93.2 | 801   | CS_v2 | 33,467,982 | 801   | 55.58% |
| 12 | D_15_00991_DT_CS | 45 | 92.9 | 869   | CS_v2 | 37,093,742 | 869   | 54.99% |
| 12 | D_15_00995_DT_CS | 44 | 92.6 | 817   | CS_v2 | 34,858,838 | 817   | 54.15% |
| 12 | D_15_00996_DT_CS | 47 | 91.8 | 750   | CS_v2 | 40,322,562 | 750   | 59.28% |
| 12 | D_15_00998_DT_CS | 45 | 92.3 | 843   | CS_v2 | 34,921,672 | 843   | 55.72% |
| 12 | D_15_01003_DT_CS | 45 | 91.4 | 978   | CS_v2 | 39,068,476 | 978   | 57.09% |
| 12 | D_15_01004_DT_CS | 46 | 89   | 802   | CS_v2 | 40,558,872 | 802   | 53.50% |
| 12 | D_15_01014_DP_CS | 50 | 89.8 | 383   | CS_v2 | 44,553,486 | 383   | 47.62% |
| 12 | D_15_01023_DT_CS | 46 | 90.6 | 853   | CS_v2 | 39,304,408 | 853   | 54.95% |
| 12 | D_15_01160_DP_CS | 49 | 90.8 | 939   | CS_v2 | 39,757,448 | 939   | 57.68% |
| 12 | D_15_01162_DP_CS | 50 | 90.4 | 938   | CS_v2 | 42,175,174 | 938   | 55.81% |
| 12 | D_15_01169_DP_CS | 47 | 91   | 926   | CS_v2 | 40,641,240 | 926   | 54.83% |
| 12 | D_15_01170_DP_CS | 47 | 88.9 | 1,032 | CS_v2 | 47,583,198 | 1,032 | 54.97% |
| 12 | D_15_01171_DP_CS | 49 | 90.9 | 924   | CS_v2 | 39,150,260 | 924   | 55.92% |
| 12 | D_15_01221_DP_CS | 48 | 90.2 | 1,090 | CS_v2 | 46,415,022 | 1,090 | 58.30% |
| 12 | D_15_01222_DP_CS | 49 | 89   | 1,113 | CS_v2 | 46,197,646 | 1,113 | 57.69% |
| 12 | D_15_01224_DP_CS | 51 | 89.8 | 615   | CS_v2 | 39,479,928 | 615   | 55.47% |
| 12 | D_15_01225_DP_CS | 50 | 89.4 | 253   | CS_v2 | 39,676,900 | 253   | 45.70% |
| 12 | D_15_01227_DP_CS | 46 | 91.4 | 1,098 | CS_v2 | 43,941,434 | 1,098 | 58.53% |
| 12 | D_15_01233_DT_CS | 46 | 89.8 | 951   | CS_v2 | 39,049,634 | 951   | 56.23% |
| 12 | D_15_01236_DT_CS | 46 | 90.1 | 1,020 | CS_v2 | 41,763,322 | 1,020 | 59.69% |
| 12 | D_15_01419_DP_CS | 48 | 88.4 | 874   | CS_v2 | 43,426,078 | 874   | 52.30% |
| 12 | D_15_01421_DP_CS | 50 | 87.7 | 643   | CS_v2 | 37,194,032 | 643   | 49.77% |
| 12 | D_15_01427_DP_CS | 48 | 88.5 | 830   | CS_v2 | 42,720,190 | 830   | 54.30% |
| 12 | D_15_01442_DP_CS | 51 | 89.9 | 832   | CS_v2 | 39,396,580 | 832   | 54.87% |
| 12 | D_15_01752_DP_CS | 49 | 90.7 | 878   | CS_v2 | 35,908,110 | 878   | 56.63% |
| 12 | D_15_01759_DP_CS | 49 | 88.4 | 989   | CS_v2 | 42,000,296 | 989   | 57.14% |
| 12 | D_15_01768_DT_CS | 45 | 90.9 | 979   | CS_v2 | 44,107,242 | 979   | 54.51% |
| 13 | 15_00034_DT_CS   | 46 | 92.2 | 1,572 | CS_v1 | 15,164,072 | 1,572 | 65.34% |
| 13 | 15_00042_DP_CS   | 47 | 91   | 1,524 | CS_v1 | 14,867,024 | 1,524 | 64.51% |



Supplemental Table for:

Clinical application of targeted deep sequencing in solid-cancer patients: Utility of targeted deep sequencing for biomarker-selected clinical trial

Seung Tae Kim et al.

|    |                  |    |      |       |       |            |        |        |
|----|------------------|----|------|-------|-------|------------|--------|--------|
| 13 | 15_00061_DP_CS   | 48 | 90.8 | 1,148 | CS_v2 | 46,165,738 | 1,148  | 57.75% |
| 13 | 15_00062_DP_CS   | 51 | 89.7 | 174   | CS_v1 | 12,703,602 | 174    | 30.73% |
| 13 | 15_00160_DP_CS   | 51 | 90.1 | 1,377 | CS_v1 | 16,730,018 | 1,377  | 58.74% |
| 13 | 15_00168_DT_CS   | 46 | 91.2 | 1,475 | CS_v1 | 14,735,188 | 1,475  | 63.28% |
| 13 | 15_00221_DP_CS   | 50 | 89.2 | 1,406 | CS_v1 | 13,357,184 | 1,406  | 66.29% |
| 13 | 15_00223_DP_CS   | 51 | 88.4 | 939   | CS_v1 | 12,688,580 | 939    | 59.84% |
| 13 | 15_00227_DP_CS   | 50 | 89   | 1,353 | CS_v1 | 14,303,234 | 1,353  | 61.70% |
| 13 | 15_00254_DT_CS   | 49 | 89.3 | 1,407 | CS_v2 | 42,703,602 | 1408.0 | 60.09% |
| 13 | 15_00283_DP_CS   | 48 | 91.9 | 815   | CS_v2 | 40,965,520 | 815    | 54.07% |
| 13 | 15_00284_DP_CS   | 50 | 91.3 | 772   | CS_v2 | 36,410,054 | 772    | 54.50% |
| 13 | 15_00404_DP_CS   | 48 | 92.4 | 808   | CS_v2 | 35,844,762 | 808    | 56.33% |
| 13 | 15_00406_DP_CS   | 50 | 90.3 | 764   | CS_v2 | 38,281,448 | 764    | 54.73% |
| 13 | 15_00407_DP_CS   | 49 | 90.8 | 790   | CS_v2 | 36,274,332 | 790    | 55.94% |
| 13 | 15_00429_DP_CS   | 50 | 91   | 863   | CS_v2 | 40,269,074 | 863    | 57.00% |
| 13 | CS11_14_01335    | 47 | 89.2 | 622   | CS_v1 | 9,441,582  | 622    | 53.36% |
| 13 | CS11_14_01338    | 47 | 90.3 | 660   | CS_v1 | 10,797,128 | 660    | 51.28% |
| 13 | CS11_14_01366    | 48 | 90.7 | 554   | CS_v1 | 11,267,184 | 554    | 50.93% |
| 13 | CS11_14_02241    | 49 | 92.3 | 616   | CS_v1 | 6,033,572  | 616    | 65.42% |
| 13 | CS11_14_02242    | 49 | 93.3 | 608   | CS_v1 | 5,504,872  | 608    | 66.54% |
| 13 | CS11_14_02312    | 50 | 88.8 | 954   | CS_v1 | 11,399,798 | 954    | 59.15% |
| 13 | CS11_14_02313    | 48 | 90   | 1,330 | CS_v1 | 12,072,580 | 1,330  | 65.12% |
| 13 | CS11_14_02335    | 49 | 93.1 | 1,063 | CS_v1 | 11,121,658 | 1,063  | 59.97% |
| 13 | CS11_14_02336    | 49 | 91   | 1,332 | CS_v1 | 13,504,252 | 1,332  | 60.09% |
| 13 | CS11_14_02337    | 48 | 91.4 | 1,360 | CS_v1 | 15,220,656 | 1,360  | 60.51% |
| 13 | CS11_14_02494    | 50 | 88.5 | 1,223 | CS_v1 | 11,921,370 | 1,223  | 64.79% |
| 13 | CS11_14_02496    | 51 | 89.5 | 1,280 | CS_v1 | 13,316,306 | 1,280  | 62.59% |
| 13 | CS11_14_02596    | 50 | 89.2 | 942   | CS_v1 | 11,466,030 | 942    | 64.70% |
| 13 | CS11_14_02597    | 49 | 89.3 | 1,171 | CS_v1 | 10,192,260 | 1,171  | 69.71% |
| 13 | CS11_14_02599    | 49 | 89.9 | 1,468 | CS_v1 | 13,316,330 | 1,468  | 70.23% |
| 13 | CS11_14_02623    | 51 | 88.9 | 1,188 | CS_v1 | 10,798,444 | 1,188  | 67.91% |
| 13 | CS11_14_02673    | 50 | 90.3 | 1,189 | CS_v2 | 49,879,362 | 1,189  | 15.51% |
| 13 | CS11_14_02675    | 49 | 91.5 | 998   | CS_v2 | 41,642,408 | 998    | 17.03% |
| 13 | CS11_14_02704    | 51 | 89.9 | 1,052 | CS_v2 | 50,438,034 | 1,052  | 15.47% |
| 13 | CS11_14_02707    | 53 | 87.8 | 498   | CS_v1 | 13,448,798 | 498    | 48.27% |
| 13 | CS11_14_02719    | 45 | 92   | 1,147 | CS_v2 | 43,824,900 | 1,147  | 15.49% |
| 13 | CS11_14_03234    | 45 | 91.7 | 1,144 | CS_v2 | 45,913,352 | 1,144  | 15.73% |
| 13 | CS11_14_03366    | 49 | 89.2 | 1,109 | CS_v2 | 42,522,580 | 1,109  | 15.88% |
| 13 | CS11_14_03371    | 47 | 89.3 | 1,302 | CS_v2 | 50,492,128 | 1,302  | 15.63% |
| 13 | D_15_00855_DP_CS | 50 | 89.6 | 702   | CS_v2 | 41,200,596 | 702    | 54.01% |
| 13 | D_15_01005_DP_CS | 50 | 89.4 | 939   | CS_v2 | 44,621,032 | 939    | 56.96% |
| 13 | D_15_01009_DP_CS | 49 | 89.4 | 741   | CS_v2 | 42,302,054 | 741    | 56.37% |
| 13 | D_15_01015_DP_CS | 48 | 91.5 | 893   | CS_v2 | 42,038,100 | 893    | 53.95% |
| 13 | D_15_01093_DT_CS | 45 | 90.5 | 992   | CS_v2 | 40,558,800 | 992    | 58.70% |
| 13 | D_15_01165_DP_CS | 50 | 90.8 | 450   | CS_v2 | 39,928,686 | 450    | 52.20% |
| 13 | D_15_01172_DP_CS | 51 | 89.6 | 514   | CS_v2 | 39,607,408 | 514    | 50.23% |
| 13 | D_15_01173_DP_CS | 49 | 89.2 | 912   | CS_v2 | 40,175,810 | 912    | 55.81% |
| 13 | D_15_01175_DP_CS | 52 | 87.5 | 795   | CS_v2 | 40,918,584 | 795    | 57.63% |
| 13 | D_15_01235_DP_CS | 53 | 88.2 | 761   | CS_v2 | 39,941,154 | 761    | 54.74% |
| 13 | D_15_01423_DP_CS | 50 | 88.2 | 424   | CS_v2 | 39,378,080 | 424    | 45.98% |
| 13 | D_15_01433_DP_CS | 47 | 88   | 833   | CS_v2 | 41,820,346 | 833    | 55.41% |
| 13 | D_15_01443_DP_CS | 49 | 88   | 1,059 | CS_v2 | 48,572,820 | 1,059  | 54.06% |

Supplemental Table for:

Clinical application of targeted deep sequencing in solid-cancer patients: Utility of targeted deep sequencing for biomarker-selected clinical trial

Seung Tae Kim et al.

|          |                  |      |      |       |       |            |       |        |
|----------|------------------|------|------|-------|-------|------------|-------|--------|
| 13       | D_15_01447_DP_CS | 48   | 91   | 923   | CS_v2 | 40,102,812 | 923   | 54.09% |
| 13       | D_15_01449_DP_CS | 52   | 87.1 | 1,109 | CS_v2 | 50,245,184 | 1,109 | 57.81% |
| 13       | D_15_01760_DP_CS | 51   | 87.4 | 768   | CS_v2 | 39,014,144 | 768   | 53.96% |
| 13       | D_15_01761_DP_CS | 50   | 90.6 | 662   | CS_v2 | 41,791,596 | 662   | 52.59% |
| 13       | D_15_01769_DT_CS | 45   | 91.1 | 1,030 | CS_v2 | 43,985,198 | 1,030 | 57.95% |
| 13       | D_15_01788_DP_CS | 48   | 90.3 | 1,027 | CS_v2 | 40,287,190 | 1,027 | 59.69% |
| 13       | D_15_01791_DP_CS | 51   | 88.8 | 800   | CS_v2 | 44,320,936 | 800   | 52.27% |
| 13       | D_15_01792_DP_CS | 51   | 89.4 | 977   | CS_v2 | 41,603,686 | 977   | 56.66% |
| 13       | D_15_01798_DT_CS | 45   | 91.3 | 882   | CS_v2 | 39,560,160 | 882   | 50.87% |
| 16       | 15_00043_DP_CS   | 49   | 91.5 | 1,764 | CS_v1 | 17,985,116 | 1,764 | 63.54% |
| 16       | 15_00162_DP_CS   | 50   | 89.2 | 1,472 | CS_v1 | 13,962,930 | 1,472 | 63.29% |
| 16       | 15_00274_DP_CS   | 48   | 90.1 | 1,034 | CS_v2 | 44,804,336 | 1,034 | 58.47% |
| 16       | 15_00275_DP_CS   | 48   | 89.1 | 920   | CS_v2 | 46,237,072 | 920   | 55.92% |
| 16       | 15_00276_DP_CS   | 48   | 89.1 | 1,093 | CS_v2 | 50,681,786 | 1,093 | 56.00% |
| 16       | 15_00277_DP_CS   | 48   | 89.2 | 1,057 | CS_v2 | 50,636,356 | 1,057 | 54.53% |
| 16       | 15_00278_DP_CS   | 49   | 88.8 | 794   | CS_v2 | 46,002,222 | 794   | 51.80% |
| 16       | 15_00286_DP_CS   | 51   | 90.9 | 677   | CS_v2 | 35,855,898 | 677   | 52.98% |
| 16       | 15_00287_DP_CS   | 49   | 92   | 835   | CS_v2 | 35,687,184 | 835   | 56.65% |
| 16       | 15_00412_DP_CS   | 49   | 91.2 | 723   | CS_v2 | 36,265,030 | 723   | 53.27% |
| 16       | CS11_14_01357    | 51   | 87.2 | 793   | CS_v1 | 10,456,420 | 793   | 50.62% |
| 16       | CS11_14_01364    | 47   | 90.1 | 812   | CS_v1 | 11,454,182 | 812   | 54.77% |
| 16       | CS11_14_02243    | 49   | 93.1 | 564   | CS_v1 | 5,687,884  | 564   | 65.87% |
| 16       | CS11_14_02316    | 49   | 90.4 | 1,071 | CS_v1 | 9,843,236  | 1,071 | 60.47% |
| 16       | CS11_14_02333    | 49.5 | 90.7 | 74    | CS_v1 | 8,700,284  | 74    | 30.64% |
| 16       | CS11_14_02487    | 54   | 88.8 | 75    | CS_v1 | 9,176,280  | 75    | 34.87% |
| 16       | CS11_14_02500    | 51   | 88.2 | 1,130 | CS_v1 | 12,059,828 | 1,130 | 59.59% |
| 16       | CS11_14_02688    | 50   | 90.4 | 882   | CS_v2 | 52,885,534 | 882   | 14.90% |
| 16       | CS11_14_03372    | 50   | 89.5 | 1,335 | CS_v2 | 51,628,328 | 1,335 | 15.72% |
| 16       | D_15_00804_DP_CS | 50   | 89.1 | 1,010 | CS_v2 | 42,808,372 | 1,010 | 54.56% |
| 16       | D_15_00857_DP_CS | 50   | 88.5 | 902   | CS_v2 | 41,771,306 | 902   | 55.85% |
| 16       | D_15_00858_DP_CS | 50   | 89.1 | 721   | CS_v2 | 38,087,448 | 721   | 55.06% |
| 16       | D_15_01017_DP_CS | 49   | 90.8 | 728   | CS_v2 | 40,758,894 | 728   | 54.79% |
| 16       | D_15_01161_DP_CS | 49   | 91.3 | 954   | CS_v2 | 39,096,336 | 954   | 57.34% |
| 16       | D_15_01163_DP_CS | 50   | 90.3 | 966   | CS_v2 | 39,886,686 | 966   | 56.24% |
| 16       | D_15_01164_DP_CS | 48   | 90.9 | 966   | CS_v2 | 40,793,594 | 966   | 55.66% |
| 16       | D_15_01174_DP_CS | 47   | 90.3 | 950   | CS_v2 | 43,175,150 | 950   | 56.28% |
| 16       | D_15_01234_DP_CS | 49   | 89.6 | 763   | CS_v2 | 42,563,730 | 763   | 57.09% |
| 16       | D_15_01272_DP_CS | 49   | 89.5 | 965   | CS_v2 | 42,355,308 | 965   | 56.04% |
| 16       | D_15_01420_DP_CS | 49   | 88.5 | 678   | CS_v2 | 41,328,410 | 678   | 49.80% |
| 16       | D_15_01422_DP_CS | 53   | 83.9 | 349   | CS_v2 | 34,791,190 | 349   | 40.97% |
| 16       | D_15_01424_DP_CS | 49   | 91.1 | 269   | CS_v2 | 36,273,210 | 269   | 42.78% |
| 16       | D_15_01425_DP_CS | 49   | 87.4 | 821   | CS_v2 | 42,744,570 | 821   | 54.08% |
| 16       | D_15_01429_DP_CS | 48   | 88.6 | 820   | CS_v2 | 42,740,546 | 820   | 53.79% |
| 16       | D_15_01430_DP_CS | 51   | 87.6 | 525   | CS_v2 | 39,568,708 | 525   | 49.78% |
| 16       | D_15_01444_DP_CS | 50   | 88.4 | 891   | CS_v2 | 40,403,792 | 891   | 56.15% |
| 16       | D_15_01445_DP_CS | 49   | 90.3 | 899   | CS_v2 | 39,074,456 | 899   | 55.28% |
| 16       | D_15_01446_DP_CS | 49   | 89.3 | 967   | CS_v2 | 39,371,538 | 967   | 56.72% |
| 16       | D_15_01757_DP_CS | 49   | 89.5 | 1,043 | CS_v2 | 39,653,146 | 1,043 | 60.46% |
| 16       | D_15_01797_DP_CS | 49   | 89.5 | 979   | CS_v2 | 40,476,764 | 979   | 59.60% |
| 14/15/17 | 15_00054_DP_CS   | 49   | 91.9 | 1,681 | CS_v1 | 15,694,724 | 1,681 | 66.59% |
| 14/15/17 | 15_00057_DP_CS   | 50   | 91.6 | 1,743 | CS_v1 | 15,803,116 | 1,743 | 65.90% |

Supplemental Table for:

Clinical application of targeted deep sequencing in solid-cancer patients: Utility of targeted deep sequencing for biomarker-selected clinical trial

Seung Tae Kim et al.

|          |                  |    |      |       |       |            |       |        |
|----------|------------------|----|------|-------|-------|------------|-------|--------|
| 14/15/17 | 15_00060_DP_CS   | 51 | 91.2 | 877   | CS_v1 | 14,664,638 | 877   | 54.18% |
| 14/15/17 | 15_00068_DT_CS   | 46 | 92.5 | 1,770 | CS_v1 | 15,876,578 | 1,770 | 66.94% |
| 14/15/17 | 15_00141_DP_CS   | 53 | 89.7 | 855   | CS_v1 | 13,526,812 | 855   | 51.83% |
| 14/15/17 | 15_00169_DT_CS   | 46 | 91.1 | 1,336 | CS_v1 | 14,931,574 | 1,336 | 58.00% |
| 14/15/17 | 15_00205_DP_CS   | 52 | 89.8 | 981   | CS_v1 | 13,255,048 | 981   | 58.92% |
| 14/15/17 | 15_00220_DP_CS   | 47 | 90.7 | 1,283 | CS_v1 | 11,437,256 | 1,283 | 70.58% |
| 14/15/17 | 15_00226_DP_CS   | 49 | 89.2 | 1,374 | CS_v1 | 14,021,574 | 1,374 | 63.17% |
| 14/15/17 | 15_00256_DT_CS   | 49 | 89.3 | 1,315 | CS_v2 | 46,620,231 | 1,503 | 52.81% |
| 14/15/17 | 15_00272_DP_CS   | 48 | 88.6 | 917   | CS_v2 | 45,480,678 | 917   | 55.62% |
| 14/15/17 | 15_00282_DP_CS   | 49 | 92.1 | 726   | CS_v2 | 39,348,630 | 726   | 53.02% |
| 14/15/17 | 15_00285_DP_CS   | 48 | 91.9 | 960   | CS_v2 | 38,578,068 | 960   | 56.44% |
| 14/15/17 | 15_00288_DP_CS   | 48 | 91.3 | 908   | CS_v2 | 37,752,254 | 908   | 55.58% |
| 14/15/17 | 15_00289_DP_CS   | 46 | 92.3 | 908   | CS_v2 | 37,637,108 | 908   | 56.27% |
| 14/15/17 | 15_00423_DP_CS   | 46 | 90.7 | 957   | CS_v2 | 36,519,980 | 957   | 58.69% |
| 14/15/17 | 15_00430_DP_CS   | 50 | 91.1 | 689   | CS_v2 | 42,028,682 | 689   | 52.37% |
| 14/15/17 | CS11_14_01302    | 46 | 90.3 | 689   | CS_v1 | 9,032,218  | 689   | 54.57% |
| 14/15/17 | CS11_14_01310    | 45 | 90.2 | 940   | CS_v1 | 9,070,146  | 940   | 61.42% |
| 14/15/17 | CS11_14_01314    | 46 | 89.8 | 1,811 | CS_v1 | 17,851,116 | 1,811 | 63.59% |
| 14/15/17 | CS11_14_01327    | 47 | 90   | 640   | CS_v1 | 9,799,322  | 640   | 53.17% |
| 14/15/17 | CS11_14_01328    | 47 | 89.8 | 766   | CS_v1 | 9,465,658  | 766   | 56.17% |
| 14/15/17 | CS11_14_01332    | 46 | 90   | 792   | CS_v1 | 10,833,492 | 792   | 54.49% |
| 14/15/17 | CS11_14_01362    | 47 | 90.3 | 488   | CS_v1 | 10,489,104 | 488   | 48.49% |
| 14/15/17 | CS11_14_02244    | 45 | 93.8 | 591   | CS_v1 | 4,883,184  | 591   | 67.17% |
| 14/15/17 | CS11_14_02307    | 49 | 89.2 | 926   | CS_v1 | 9,165,766  | 926   | 61.89% |
| 14/15/17 | CS11_14_02317    | 49 | 89.9 | 1,058 | CS_v1 | 11,165,824 | 1,058 | 58.87% |
| 14/15/17 | CS11_14_02338    | 49 | 92   | 482   | CS_v1 | 10,707,228 | 482   | 67.15% |
| 14/15/17 | CS11_14_02339    | 47 | 90.9 | 1,368 | CS_v1 | 13,634,766 | 1,368 | 62.80% |
| 14/15/17 | CS11_14_02344    | 46 | 91.6 | 1,095 | CS_v1 | 10,684,252 | 1,095 | 62.88% |
| 14/15/17 | CS11_14_02348    | 46 | 91.1 | 1,102 | CS_v1 | 11,961,084 | 1,102 | 61.97% |
| 14/15/17 | CS11_14_02489    | 48 | 90.7 | 1,091 | CS_v1 | 11,698,958 | 1,091 | 67.23% |
| 14/15/17 | CS11_14_02499    | 51 | 87.5 | 1,458 | CS_v1 | 14,244,110 | 1,458 | 61.74% |
| 14/15/17 | CS11_14_02502    | 50 | 89.7 | 1,467 | CS_v1 | 15,426,574 | 1,467 | 62.00% |
| 14/15/17 | CS11_14_02993    | 47 | 91.2 | 1,100 | CS_v2 | 51,598,880 | 1,100 | 15.26% |
| 14/15/17 | CS11_14_02994    | 48 | 90.8 | 511   | CS_v2 | 39,448,416 | 511   | 13.86% |
| 14/15/17 | CS11_14_03163    | 49 | 91.1 | 1,021 | CS_v2 | 47,954,936 | 1,021 | 15.63% |
| 14/15/17 | CS11_14_03229    | 47 | 92.4 | 1,057 | CS_v2 | 43,895,858 | 1,057 | 14.96% |
| 14/15/17 | CS11_14_03236    | 46 | 90.3 | 1,423 | CS_v2 | 58,987,602 | 1,423 | 16.07% |
| 14/15/17 | CS11_14_03362    | 45 | 89.6 | 1,245 | CS_v2 | 45,736,626 | 1,245 | 16.18% |
| 14/15/17 | CS11_14_03370    | 49 | 88.2 | 1,207 | CS_v2 | 47,018,308 | 1,207 | 15.98% |
| 14/15/17 | D_15_00803_DP_CS | 49 | 89.7 | 799   | CS_v2 | 40,823,724 | 799   | 52.28% |
| 14/15/17 | D_15_00806_DP_CS | 48 | 90.1 | 959   | CS_v2 | 39,834,886 | 959   | 55.90% |
| 14/15/17 | D_15_00808_DP_CS | 48 | 91.1 | 894   | CS_v2 | 42,892,654 | 894   | 54.67% |
| 14/15/17 | D_15_00809_DP_CS | 47 | 90.5 | 1,000 | CS_v2 | 42,333,564 | 1,000 | 53.50% |
| 14/15/17 | D_15_00810_DP_CS | 49 | 90.4 | 532   | CS_v2 | 43,102,688 | 532   | 45.24% |
| 14/15/17 | D_15_00811_DP_CS | 51 | 89.3 | 466   | CS_v2 | 41,600,556 | 466   | 43.89% |
| 14/15/17 | D_15_00856_DP_CS | 48 | 90.5 | 611   | CS_v2 | 43,214,996 | 611   | 51.79% |
| 14/15/17 | D_15_00859_DP_CS | 48 | 89.6 | 939   | CS_v2 | 39,842,948 | 939   | 56.85% |
| 14/15/17 | D_15_00860_DP_CS | 50 | 88.7 | 895   | CS_v2 | 41,252,854 | 895   | 55.87% |
| 14/15/17 | D_15_00861_DP_CS | 50 | 90.4 | 95    | CS_v2 | 33,442,934 | 95    | 34.79% |
| 14/15/17 | D_15_00862_DP_CS | 49 | 88.3 | 691   | CS_v2 | 37,939,980 | 691   | 55.74% |
| 14/15/17 | D_15_00865_DP_CS | 49 | 90.3 | 172   | CS_v2 | 35,832,142 | 172   | 36.20% |



Supplemental Table for:

Clinical application of targeted deep sequencing in solid-cancer patients: Utility of targeted deep sequencing for biomarker-selected clinical trial

Seung Tae Kim et al.

|          |                  |    |      |       |       |            |       |        |
|----------|------------------|----|------|-------|-------|------------|-------|--------|
| 14/15/17 | D_15_01011_DP_CS | 48 | 90.3 | 743   | CS_v2 | 46,620,900 | 743   | 52.46% |
| 14/15/17 | D_15_01012_DP_CS | 47 | 91.3 | 586   | CS_v2 | 42,661,750 | 586   | 49.24% |
| 14/15/17 | D_15_01016_DP_CS | 48 | 89.1 | 558   | CS_v2 | 43,123,020 | 558   | 55.24% |
| 14/15/17 | D_15_01018_DP_CS | 47 | 91   | 423   | CS_v2 | 39,306,874 | 423   | 49.89% |
| 14/15/17 | D_15_01167_DP_CS | 50 | 91.1 | 801   | CS_v2 | 42,417,916 | 801   | 56.10% |
| 14/15/17 | D_15_01220_DP_CS | 49 | 90   | 902   | CS_v2 | 41,614,992 | 902   | 54.16% |
| 14/15/17 | D_15_01223_DP_CS | 49 | 89.5 | 891   | CS_v2 | 41,554,386 | 891   | 57.71% |
| 14/15/17 | D_15_01226_DP_CS | 50 | 89.3 | 898   | CS_v2 | 47,081,664 | 898   | 55.46% |
| 14/15/17 | D_15_01426_DP_CS | 47 | 89.1 | 745   | CS_v2 | 42,146,908 | 745   | 52.61% |
| 14/15/17 | D_15_01462_DP_CS | 48 | 91.3 | 565   | CS_v2 | 37,827,326 | 565   | 53.99% |
| 14/15/17 | D_15_01463_DP_CS | 48 | 92.4 | 266   | CS_v2 | 35,397,474 | 266   | 46.56% |
| 14/15/17 | D_15_01754_DP_CS | 49 | 88.8 | 990   | CS_v2 | 41,345,214 | 990   | 55.25% |
| 14/15/17 | D_15_01793_DP_CS | 50 | 90.1 | 782   | CS_v2 | 40,286,530 | 782   | 56.74% |
| 14/15/17 | D_15_05058_DP_CS | 52 | 90.2 | 1,023 | CS_v2 | 41,671,428 | 1,023 | 55.70% |
